# Supplementary material for: microRNAs with AAGUGC seed motif constitute an integral part of an oncogenic signaling network
Source: Oncogene. 2016 Aug 1;36(6):731–45. doi: 10.1038/onc.2016.242 (PMC5311252; doi:10.1038/onc.2016.242)
Supplement: Supplementary Information [file onc2016242x2.pdf]

*Supplementary Figures related to:*

**microRNAs with an AAGUGC seed motif constitute an integral part of a signaling network driving NSCLC cell proliferation**

*Authors:*

*Zhou Y<sup>1</sup>, Frings O<sup>1</sup>, Branca RM<sup>1</sup>, Boekel J<sup>1,2</sup>, le Sage C<sup>3</sup>, Fredlund E<sup>1</sup>, Agami R<sup>3</sup> and Orre LM<sup>1\*</sup>*

*Affiliations:*

*<sup>1</sup>Department of Oncology-Pathology, Science for Life Laboratory, Karolinska Institutet, Stockholm, Sweden.*

*<sup>2</sup>Bioinformatics Infrastructure for Life Sciences (BILS), Stockholm, Sweden.*

*<sup>3</sup>Division of Biological Stress Response, the Netherlands Cancer Institute, Amsterdam, the Netherlands.*

*\*Correspondence should be addressed to L.M.O. (lukas.orre@ki.se).*

## Supplementary Figures

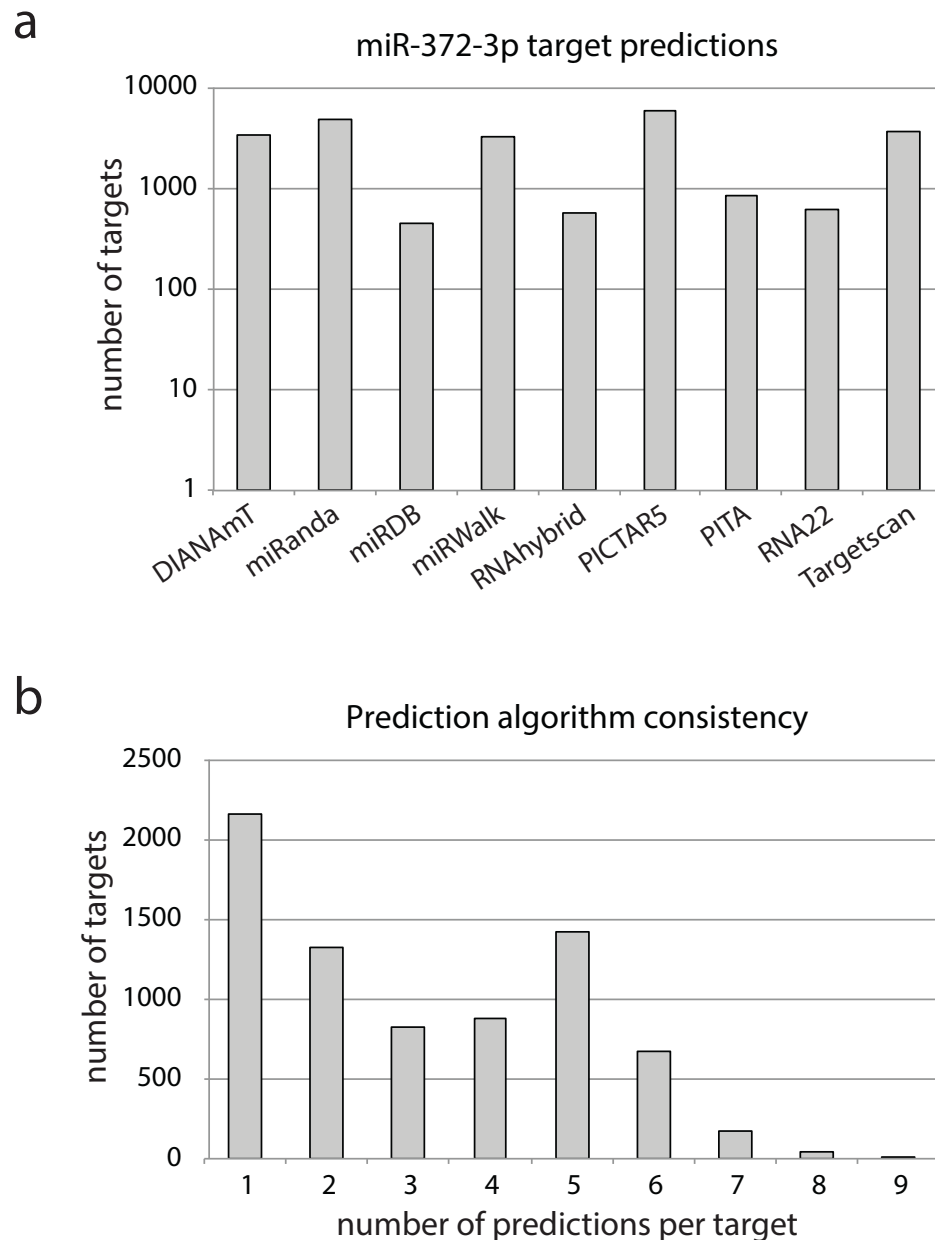

### Supplementary Figure 1. miR-372-3p target prediction algorithm overview

**a.** Nine different miRNA target prediction algorithms were used for prediction of miR-372-3p targets. A total of 7,508 different targets were predicted, with the number of predictions per algorithm ranging from 451 (miRDB) to 6,146 (PICTAR5).

**b.** An evaluation of the prediction algorithm consistency showing the number of algorithms predicting the same target, ranging from targets predicted by a single algorithm (2,154 mRNAs) to all nine (only 2 mRNAs). In addition, a local maximum is evident for targets predicted by 5 different target prediction algorithms.

## 28 miRNAs in the human genome with AAGUGC-motif in seed sequence

| microRNA ID  | Mature miRNA | Mature Sequence                   | Chromosome | Genomic context | miRNA cluster        |
|--------------|--------------|-----------------------------------|------------|-----------------|----------------------|
| hsa-mir-17   | miR-17-5p    | <b>CA</b> AAGUGC UUACAGUGCAGGUAG  | Chr 13     | MIR17HG intron  | miR-17~92 cluster    |
| hsa-mir-20a  | miR-20a-5p   | <b>UA</b> AAGUGC CUUAUAGUGCAGGUAG |            |                 |                      |
| hsa-mir-106a | miR-106a-5p  | <b>AA</b> AAGUGC CUUACAGUGCAGGUAG | Chr X      | Intergenic      | miR-106a~363 cluster |
| hsa-mir-20b  | miR-20b-5p   | <b>CA</b> AAGUGC CUCAUAGUGCAGGUAG |            |                 |                      |
| hsa-mir-106b | miR-106b-5p  | <b>UA</b> AAGUGC CUGACAGUGCAGAU   | Chr 7      | MCM7 intron     | miR-106b~25 cluster  |
| hsa-mir-93   | miR-93-5p    | <b>CA</b> AAGUGC CUGUUCGUGCAGGUAG |            |                 |                      |
| hsa-mir-302a | miR-302a-3p  | <b>U</b> AAGUGC CUCCAUGUUUUGGUGA  | Chr 4      | Intergenic      | miR-302~367 cluster  |
| hsa-mir-302b | miR-302b-3p  | <b>U</b> AAGUGC CUCCAUGUUUUGGUGA  |            |                 |                      |
| hsa-mir-302c | miR-302c-3p  | <b>U</b> AAGUGC CUCCAUGUUUUGGUGG  |            |                 |                      |
| hsa-mir-302d | miR-302d-3p  | <b>U</b> AAGUGC CUCCAUGUUUUGGUGU  |            |                 |                      |
| hsa-mir-302e | miR-302e     | <b>U</b> AAGUGC CUCCAUGCUU        | Chr 11     | Intergenic      |                      |
| hsa-mir-371a | miR-371a-3p  | <b>A</b> AAGUGC CGCAUCUUUUGAGUGU  | Chr 19     | Intergenic      | miR-371~373 cluster  |
| hsa-mir-371b | miR-371b-3p  | <b>A</b> AAGUGC CCCACAGUUUUGAGUGC |            |                 |                      |
| hsa-mir-372  | miR-372-3p   | <b>A</b> AAGUGC CUGCGACAUUUGAGCGU |            |                 |                      |
| hsa-mir-373  | miR-373-3p   | <b>G</b> AAGUGC CUCCAUGUUUUGGGUGU |            |                 |                      |
| hsa-mir-512  | miR-512-3p   | <b>A</b> AAGUGC CUGCAUAGCUGAGGUC  | Chr 19     | Intergenic      | C19MC                |
| hsa-mir-519a | miR-519a-3p  | <b>A</b> AAGUGC CAUCCUUUUGAGGUGU  |            |                 |                      |
| hsa-mir-519b | miR-519b-3p  | <b>A</b> AAGUGC CAUCCUUUUGAGGUGU  |            |                 |                      |
| hsa-mir-519c | miR-519c-3p  | <b>A</b> AAGUGC CAUCCUUUUGAGGAGU  |            |                 |                      |
| hsa-mir-519d | miR-519d-3p  | <b>CA</b> AAGUGC CUCCUUUUGAGGUG   |            |                 |                      |
| hsa-mir-519e | miR-519e-3p  | <b>A</b> AAGUGC CUCCUUUUGAGGUGU   |            |                 |                      |
| hsa-mir-520a | miR-520a-3p  | <b>A</b> AAGUGC CUCCUUUUGGACUGU   |            |                 |                      |
| hsa-mir-520b | miR-520b     | <b>A</b> AAGUGC CUCCUUUUGAGGGG    |            |                 |                      |
| hsa-mir-520c | miR-520c-3p  | <b>A</b> AAGUGC CUCCUUUUGAGGGU    |            |                 |                      |
| hsa-mir-520d | miR-520d-3p  | <b>A</b> AAGUGC CUCCUUUUGGUGGGU   |            |                 |                      |
| hsa-mir-520e | miR-520e     | <b>A</b> AAGUGC CUCCUUUUGAGGGG    |            |                 |                      |
| hsa-mir-520f | miR-520f-3p  | <b>A</b> AAGUGC CUCCUUUUGAGGGU    |            |                 |                      |
| hsa-mir-526b | miR-526b-3p  | <b>G</b> AAGUGC CUCCUUUUGAGGC     |            |                 |                      |

**oncomotif**

### Supplementary Figure 2. Human microRNAs with AAGUGC-motif (oncomotif) in seed-sequence

An analysis of the human miRNA seed sequences resulted in the identification of 28 different miRNAs with an AAGUGC-motif (red), here referred to as oncomotif, in their seed sequence. Mature miRNA sequences were retrieved from miRBase 21, seed sequences (5' nucleotides 1-8) are indicated in bold. The 28 different miRNAs are expressed from 7 different genomic loci. All AAGUGC-miRNAs except hsa-mir-302e are present in genomic clusters with other AAGUGC-miRNAs. Two of these miRNA clusters (miR-17~92 and miR-106b~25) are located in an intron of a so called miRNA host gene (*MIR17HG* and *MCM7* respectively). All other AAGUGC-miRNAs are located in intergenic regions. Indicated in green are the four miRNAs identified in the functional genomics screen. These 28 miRNAs are here referred to as oncomotif-miRNAs.

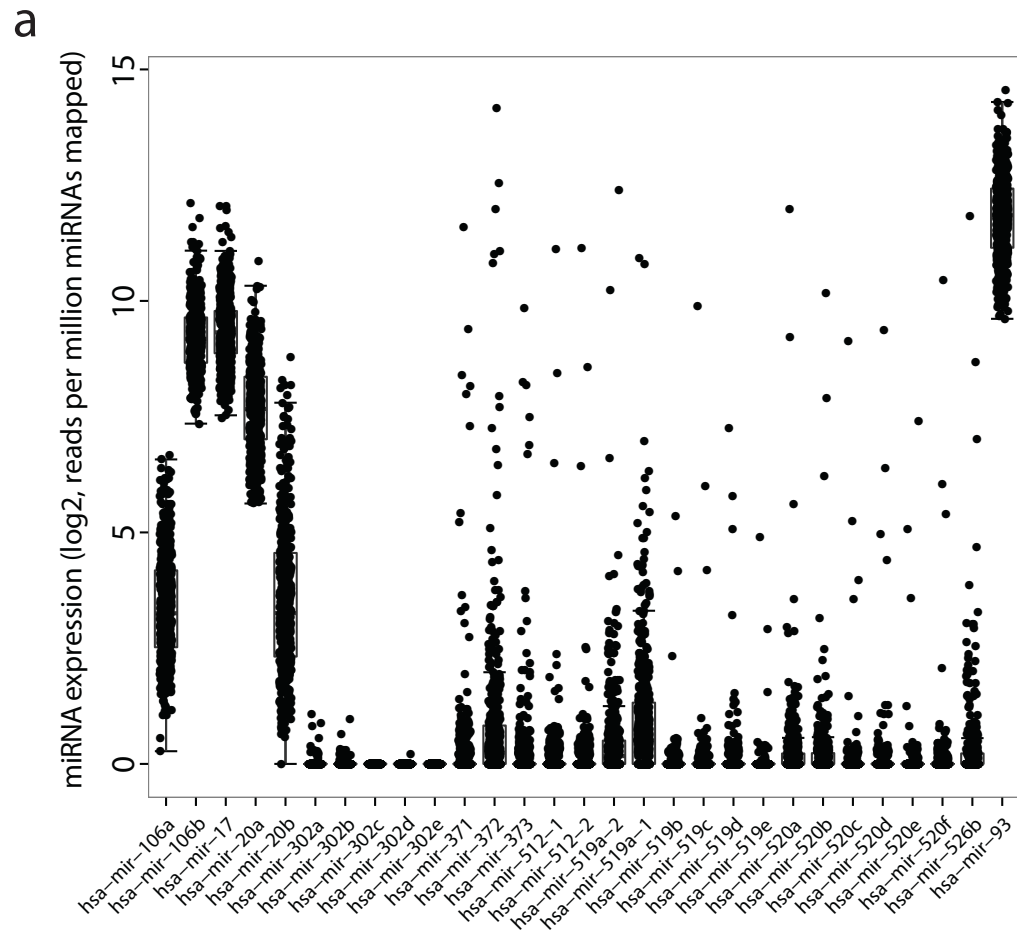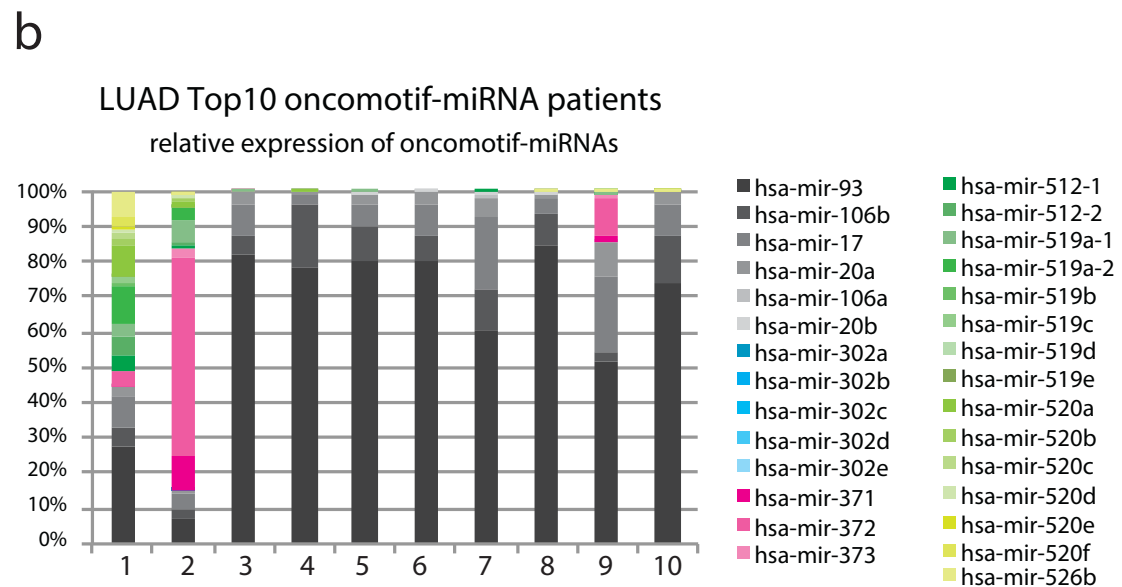

Supplementary Figure 3. Legend on next page

**Supplementary Figure 3. Oncomotif-miRNA expression in lung adenocarcinoma**

**a.** Boxplot showing the expression of individual oncomotif-miRNAs in 445 cases of lung adenocarcinoma (data retrieved from TCGA LUAD). The highest median expression is seen for hsa-mir-93, followed by hsa-mir-17 and hsa-mir-106b. Sporadic high expression is seen for oncomotif-miRNAs in the miR-371~373 cluster as well as the C19MC cluster.

**b.** Bar chart showing the relative contribution of different oncomotif-miRNAs to the sum of all oncomotif-miRNAs in the top10 oncomotif-miRNA expressing lung adenocarcinoma cases. In most cases hsa-mir-93 is the dominating miRNA, but occasionally expression from other loci is dominating as seen for the two tumors with the highest oncomotif-miRNA expression.



d. Ingenuity pathway analysis of the 275 oncomotif-miRNA signature genes resulted in a top-ranking cell cycle related network centered around E2F1.

a oncomotif-miRNA expression vs. mutational status

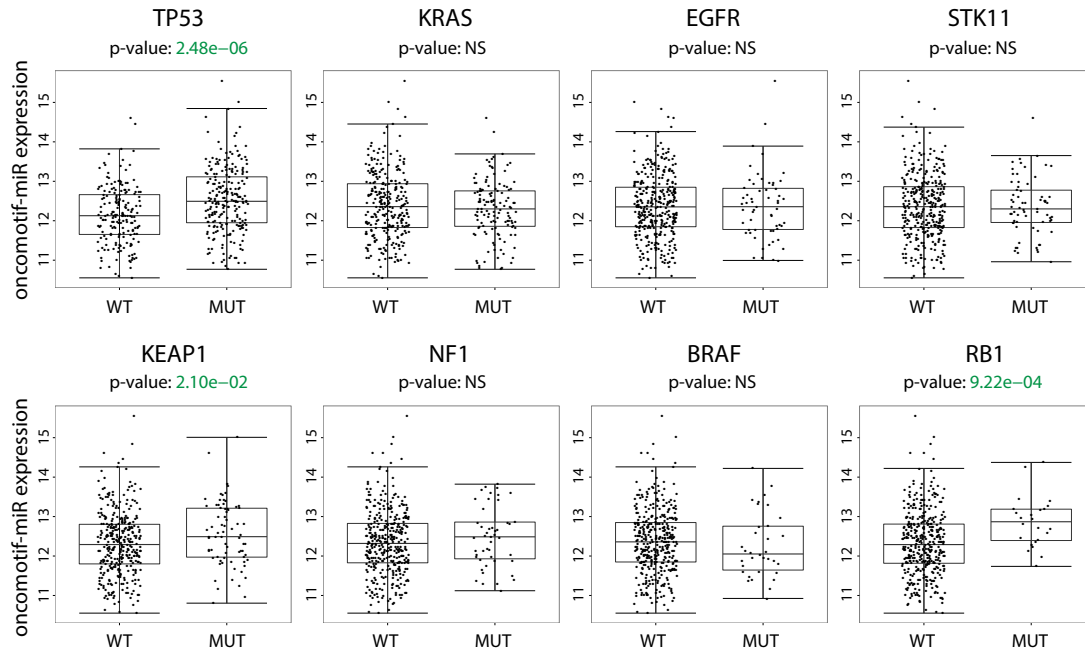

b oncomotif-miRNA expression vs. gene copy number alteration

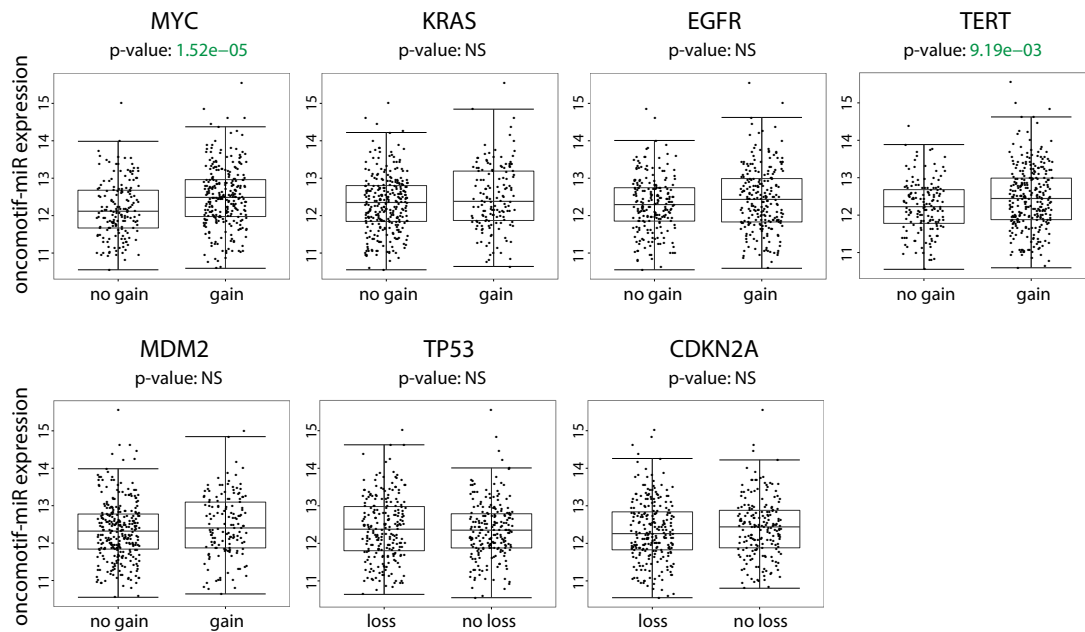

Supplementary Figure 5. Legend on next page

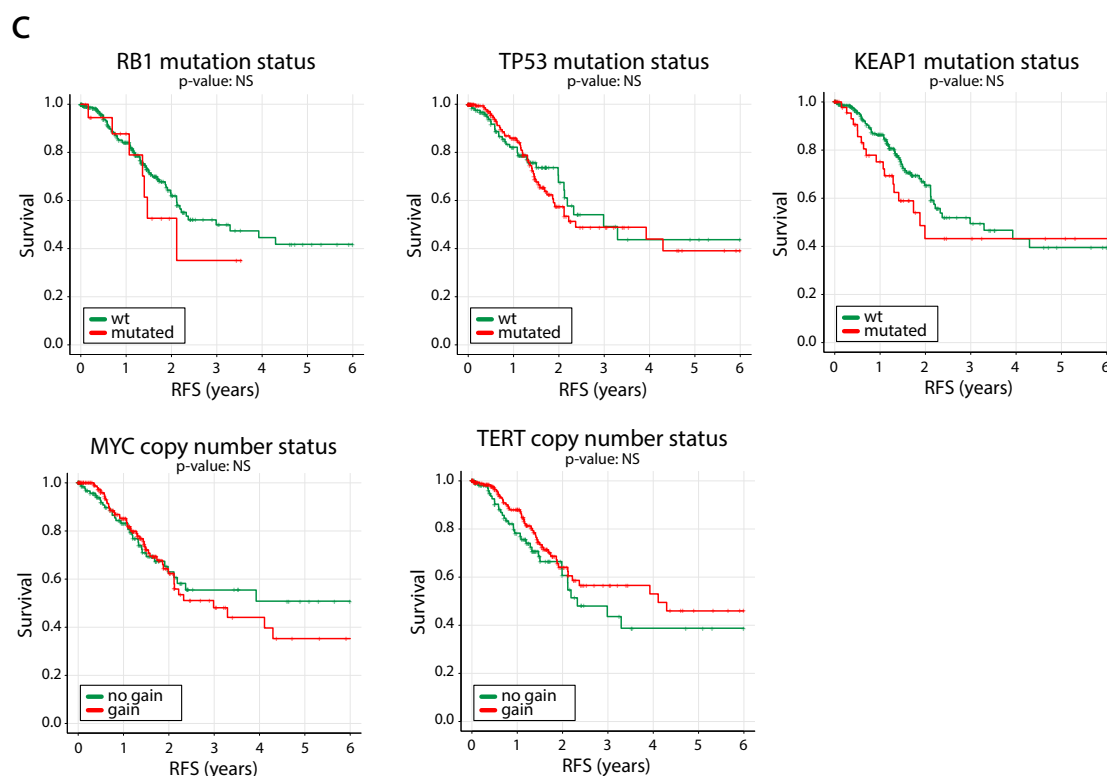

**d**

| Hazard Ratio (univariate)    |      |           |          |     |
|------------------------------|------|-----------|----------|-----|
|                              | HR   | 95% CI    | p.val    | No. |
| oncomotif-miRNA high cluster | 1.72 | 1.09-2.72 | 1.97e-02 | 445 |
| RB1 mut                      | 1.42 | 0.65-3.08 | NS       | 416 |
| TP53 mut                     | 1.06 | 0.68-1.66 | NS       | 416 |
| KEAP1 mut                    | 1.55 | 0.92-2.59 | NS       | 416 |
| MYC cnv                      | 1.10 | 0.71-1.70 | NS       | 441 |
| TERT cnv                     | 0.72 | 0.46-1.11 | NS       | 441 |

  

| Hazard Ratio (multivariate)  |      |           |          |     |
|------------------------------|------|-----------|----------|-----|
|                              | HR   | 95% CI    | p.val    | No. |
| oncomotif-miRNA high cluster | 2.06 | 1.21-3.51 | 8.14e-03 | 413 |
| RB1 mut                      | 1.25 | 0.56-2.81 | NS       | 413 |
| TP53 mut                     | 0.82 | 0.47-1.45 | NS       | 413 |
| KEAP1 mut                    | 1.38 | 0.81-2.36 | NS       | 413 |
| MYC gain                     | 0.97 | 0.71-1.33 | NS       | 413 |
| TERT gain                    | 0.89 | 0.64-1.24 | NS       | 413 |

### Supplementary Figure 5. Oncomotif-miRNA expression and common genetic alterations in lung adenocarcinoma

**a.** Boxplots showing the expression of oncomotif-miRNAs in relation to mutation status of genes commonly mutated in lung adenocarcinoma (LUAD, TCGA). **b.** Boxplots showing the expression of oncomotif-miRNAs in relation to copy number of genes commonly showing copy-number variation in lung adenocarcinoma (LUAD, TCGA). **c.** Kaplan-Meier plots of relapse free survival (truncated at 6 years) for genetic alterations significantly associated with oncomotif-miRNA expression (**Supplementary Figure 5a** and **b**, indicated in green). **d.** Univariate and multivariate survival analyses by Cox proportional hazard regression for genetic alterations associated with oncomotif-miRNA expression. Number of TCGA samples included in each analysis depend on the availability of data from TCGA. Throughout the figure NS indicate p.values>0.05.

# oncomotif-miRNA expression in 32 cancer types from TCGA

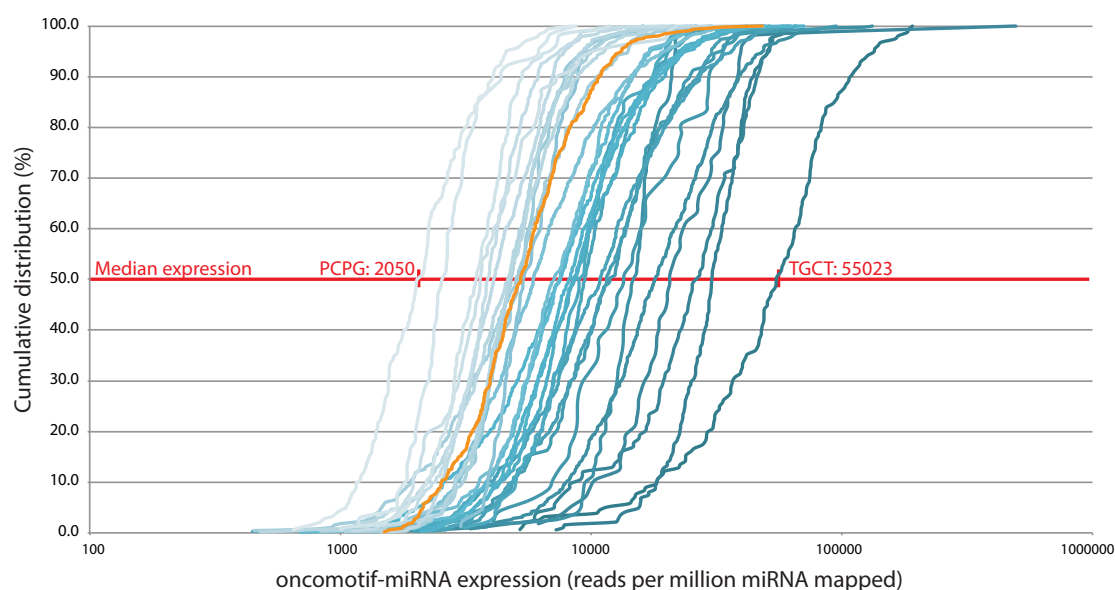

|                                                   | TCGA Code | # samples | Description                           |
|---------------------------------------------------|-----------|-----------|---------------------------------------|
| Decreasing median oncomotif-miRNA expression<br>↓ | TGCT      | 156       | Testicular Germ Cell Tumor            |
|                                                   | LAML      | 188       | AML                                   |
|                                                   | THYM      | 124       | Thymoma                               |
|                                                   | UCS       | 57        | Uterine Carcinosarcoma                |
|                                                   | SKCM      | 451       | Skin Cutaneous Melanoma               |
|                                                   | UVM       | 80        | Uveal Melanoma                        |
|                                                   | DLBC      | 47        | Lymphoid Neoplasm DLBCL               |
|                                                   | ESCA      | 185       | Esophageal carcinoma                  |
|                                                   | LUSC      | 343       | Lung SCC                              |
|                                                   | BLCA      | 410       | Bladder Urothelial Carcinoma          |
|                                                   | CESC      | 310       | Cervical SCC and endocervical AC      |
|                                                   | READ      | 94        | Rectum adenocarcinoma                 |
|                                                   | UCEC      | 412       | Uterine Corpus Endometrial Carcinoma  |
|                                                   | HNSC      | 488       | Head and Neck SCC                     |
|                                                   | LIHC      | 374       | Liver hepatocellular carcinoma        |
|                                                   | STAD      | 396       | Stomach AC                            |
|                                                   | OV        | 493       | Ovarian serous cystadenocarcinoma     |
|                                                   | COAD      | 247       | Colon AC                              |
|                                                   | BRCA      | 766       | Breast invasive carcinoma             |
|                                                   | MESO      | 87        | Mesothelioma                          |
|                                                   | LUAD      | 452       | Lung AC                               |
|                                                   | CHOL      | 36        | Cholangiocarcinoma                    |
|                                                   | SARC      | 263       | Sarcoma                               |
|                                                   | LGG       | 526       | Brain Lower Grade Glioma              |
|                                                   | KIRP      | 292       | Kidney renal papillary cell carcinoma |
|                                                   | PRAD      | 495       | Prostate AC                           |
|                                                   | THCA      | 514       | Thyroid carcinoma                     |
|                                                   | KIRC      | 255       | Kidney renal clear cell carcinoma     |
|                                                   | ACC       | 80        | Adrenocortical carcinoma              |
|                                                   | PAAD      | 179       | Pancreatic AC                         |
|                                                   | KICH      | 66        | Kidney Chromophobe                    |
|                                                   | PCPG      | 184       | Pheochromocytoma and Paranglioma      |

Supplementary Figure 6. Legend on next page

**Supplementary Figure 6. Oncomotif-miRNA expression in 32 cancer types**

Cumulative plot showing the distribution of oncomotif-miRNA expression within and across 32 cancers types (data retrieved from TCGA). The highest oncomotif-miRNA expression was seen in testicular germ cell tumor (TGCT, median oncomotif-miRNA expression 55,023), and the lowest in pheochromocytoma and paraganglioma (PCPG, median oncomotif-miRNA expression 2,050). Below the plot are the 32 different cancer types arranged from top to bottom according to the median oncomotif-miRNA expression. Indicated is also the number of cases analyzed for each cancer type.

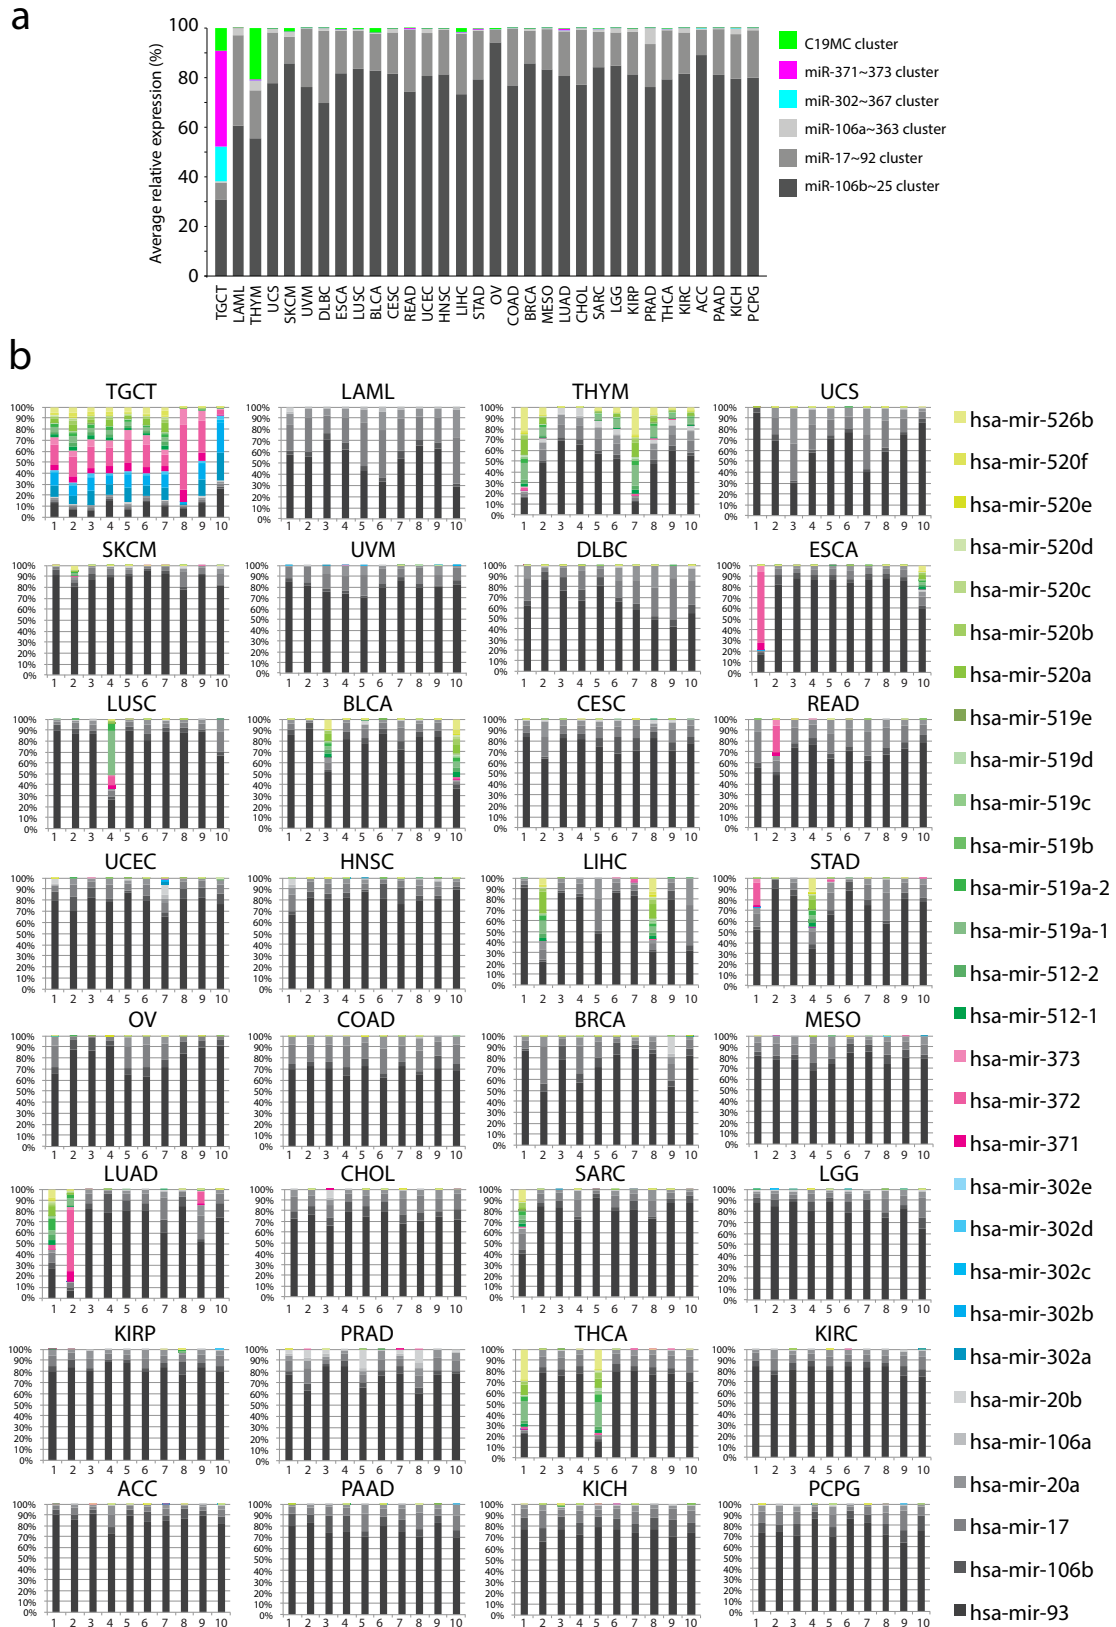

Supplementary Figure 7. Legend on next page

**Supplementary Figure 7. Relative expression of different oncomotif-miRNAs in 32 cancer types.** **a.** Bar chart showing the average relative contribution of different miRNAs (grouped by genomic clusters) to the oncomotif-miRNA expression in 32 different cancer types.

**b.** Bar chart showing the relative contribution of different miRNAs to the oncomotif-miRNA expression in the top10 expressing cases for each cancer type. As shown in both **a** and **b**, hsa-miR-93 is the dominating oncomotif-miRNA in most cases with sporadic high expression of other miRNAs. Notable exceptions are testicular germ cell cancer (TGCT) with generally high expression of oncomotif-miRNAs from the miR-371~373 , C19MC and miR-302~367 clusters, as well as thymoma (THYM) that show common expression of miRNAs from the C19MC cluster.

a

## TCGA BRCA

oncomotif-miRNA signature (275 genes)

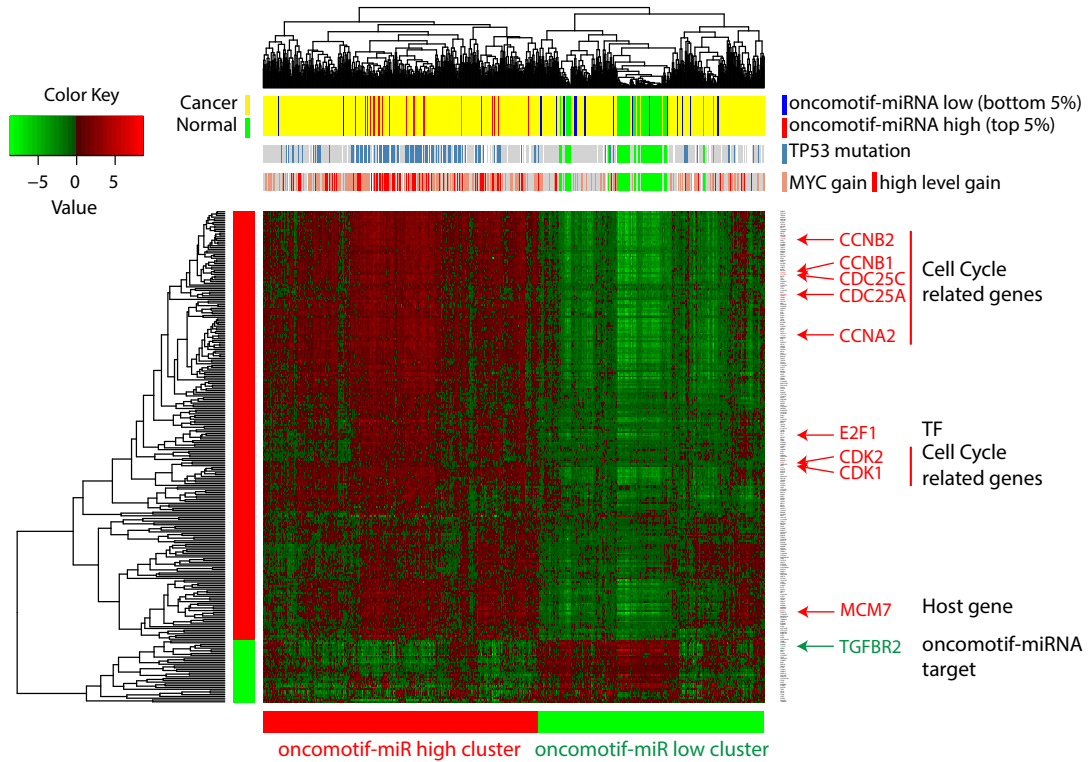

b

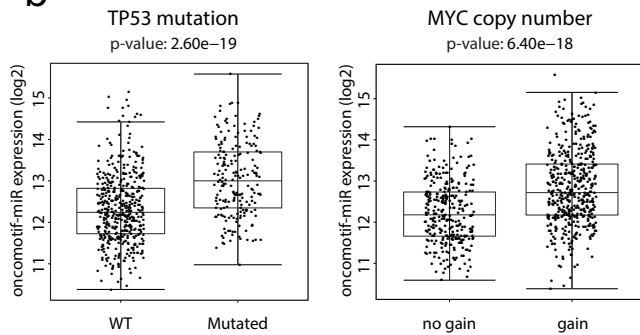

c

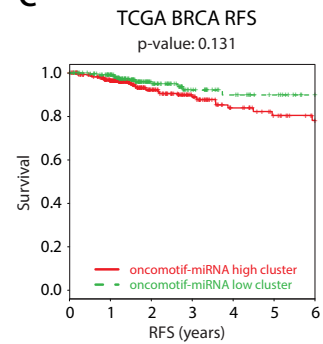

Supplementary Figure 8. Legend on next page

**Supplementary Figure 8. Cluster analysis of breast cancer based on oncomotif-miRNA signature genes.**

**a.** Heatmap showing the results of hierarchical clustering (patients horizontally and genes vertically) of 762 breast invasive carcinoma samples and 87 normal breast epithelium samples (BRCA, TCGA) based on the expression of the 275 oncomotif-miRNA signature genes (see **supplementary figure 4** for details). Heatmap colors represent mean centered log2 fpkm values. Inserts, from top to bottom, indicate; cancer (yellow), normal (green), oncomotif-miRNA high cancer (top5%, red) and low cancer (bottom5%, blue); TP53 mutated (blue) or TP53 wt (grey); MYC gain (light red), MYC high-level gain (red) or no gain (grey). Indicated on the right are a few genes with increased expression (red, oncomotif-miRNA transcription factor, oncomotif-miRNA host gene and cell cycle related genes) or decreased expression (green, oncomotif-miRNA target) in the oncomotif-miRNA high compared to low clusters.

**b.** Boxplots showing the expression of oncomotif-miRNAs in relation to *TP53* mutation and *MYC* amplification in breast invasive carcinoma (BRCA, TCGA).

**c.** Kaplan–Meier plot of relapse free survival (truncated at 6 years) for the oncomotif-miRNA high cluster patients (red, n=466) and low cluster patients (green, n=296).
